# Supplementary material for: A conceptual model for glacial lake bathymetric distribution
Source: Copernicus journal article supplement (doi:10.5194/tc-2023-12), 2023-02-21
Supplement: Supplementary file [file tc-2023-12-RC1-supplement.pdf]

Comments on 'A conceptual model for glacial lake bathymetric distribution' by Zhang et al. The authors developed a conceptual model for glacial lake bathymetric distribution using a semi-automatic simulation procedure. Glacial lake outburst floods in high mountain area caused devastating impacts on downstream lives and infrastructure in the past decades. Although it is essential for accurate GLOF simulation and risk assessment, detailed bathymetry survey is only available for limited lakes due to its remoteness. Therefore, this model can be used to simulate bathymetry distribution for more lakes in high mountain region. It is worthy to be published in the Cryosphere after a minor revision. Some comments are shown below:

- 1) Fig.3, the characters in the bottom right of the figure is too small to be read.
- 2) Caption of Fig. 6, Cirenmaco and Jialongco are in wrong order.
- 3) Please explain what the yellow, green and blue areas mean on the left side of Fig.7
- 4) In Line 271-280, the authors find that that Jialongco's GCM was closer to the cone structured, Cirenmaco GCM had similarities with the hemisphere structured by the upward-opening parabolic side, and Longbasaba GCM was more resemblant to the semi-ellipsoid. However, I can not distinguish the schematic diagrams from the Fig. 7.
